1 **Systemic application of the TRPV4 antagonist GSK2193874 induces tail vasodilation in a**  
2 **mouse model of thermoregulation**

3

4 Fiona O'Brien, Caroline A Staunton & Richard Barrett-Jolley\*

5

6

7 Department of Musculoskeletal Ageing, Faculty of Health and Life Sciences, University of  
8 Liverpool, Liverpool, L7 8TX, U.K.

9

10 \*Corresponding Author

11 Contact email: [RBJ@liverpool.ac.uk](mailto:RBJ@liverpool.ac.uk)

12

13

14

15 **Abstract**

16 In humans the skin is a primary thermoregulatory organ, with vasodilation leading to rapid  
17 body cooling, whereas in Rodentia the tail performs an analogous function. Many  
18 thermodetection mechanisms are likely to be involved including transient receptor potential  
19 vanilloid-type 4 (TRPV4), a widely distributed ion channel with both mechanical and  
20 thermosensitive properties. Previous studies have shown that TRPV4 can act as a  
21 vasodilator by local action in blood vessels, and in this study, we investigated whether  
22 TRPV4 activity effects *mus musculus* tail vascular tone and thermoregulation. We  
23 measured tail blood flow by pressure plethysmography in lightly sedated *mus musculus*  
24 (CD1 strain) at a range of ambient temperatures, with and without intraperitoneal  
25 administration of the blood brain barrier crossing TRPV4 antagonist GSK2193874. We also  
26 measured heart rate and blood pressure with and without GSK2193874. As expected for a  
27 thermoregulatory organ, we found that tail blood flow increased with temperature.  
28 However, unexpectedly we found that the TRPV4 antagonist GSK2193874 increased tail  
29 blood flow at all temperatures, and we observed changes in heart rate variability. Since  
30 TRPV4 activation stimulates the relaxation of peripheral resistance arteries (vasodilation)  
31 that would increase tail blood flow, these data suggest that increases in tail blood flow  
32 resulting from the TRPV4 antagonist may arise from a site other than the blood vessels  
33 themselves, perhaps in central cardiovascular control centres such as the hypothalamus.

## 34 **Introduction**

35 Thermoregulation is one of the defining homeostatic processes common to mammals; core  
36 body and brain temperatures are well maintained despite challenges such as changing  
37 ambient temperature and exercise to the degree that brain temperature rarely changes  
38 outside of a 3 °C range [1-3]. Mammals detect temperatures at both central and peripheral  
39 sites and responses to changing temperatures can result both from local responses and  
40 central, hypothalamus-co-ordinated autonomic responses [4-6]. Typical thermogenic  
41 effector mechanisms include liver thermogenesis and skeletal muscle shivering whereas  
42 cooling mechanisms including behavioural changes and redistribution of blood from core to  
43 peripheral vessels [4, 5, 7]. Rodents use basal metabolic rate and non-shivering  
44 thermogenesis as their principle mechanisms for heat production, mainly because of their  
45 small size [8]. In terms of heat loss, transfer of excess heat to the environment is facilitated  
46 by so-called heat transfer zones, which are usually found at the body extremities, for  
47 example, in humans, typically, acute heat loss is mediated by redistributing blood to  
48 cutaneous vascular beds [5]. The location of critical heat transfer zones are somewhat  
49 species specific, so for example, the ear for elephants and rabbits [9, 10], head vasculature  
50 in large dinosaurs [11, 12] and the feet [13] and tail for rodents [14-16]. The tail of rodents  
51 is ideal as a heat transfer zone due to its glabrous nature [16]. It thought that  
52 vasoconstriction rather than counter-current heat exchange provides the major barrier to  
53 core-to-tail heat flow [17].

54 In this work, we have investigated the role of *mus muscularis* TRPV4 in this homeostatic  
55 system using a potent and selective TRPV4 inhibitor, GSK2193874. TRPV4 is one of several  
56 temperature sensitive ion channels and expressed in both the hypothalamus and the  
57 vasculature, in both smooth muscle and endothelial cells. Recently, there has been  
58 considerable interest in the immune, neuromodulatory, cardiovascular and  
59 thermoregulatory potential of small molecule TRPV4 modulatory drugs, such as  
60 GSK2193874 and HC-067047 [18-25].

61 TRPV4 is a relatively non-selective  $\text{Ca}^{2+}$  channel (PCa/PNa 6-10) that was first characterised  
62 as mechanosensory [26, 27], however, it is also activated by temperatures  $>30$  °C, and so, at  
63 physiological temperatures, it would be expected to be constitutively active under basal  
64 conditions [28-30]. Activation of TRPV4 leads to vasodilation [31-34] and logically, therefore,

65 transgenic elimination of TRPV4 (TRPV4<sup>-/-</sup> knock out) would be expected to increase blood  
66 pressure, but it does not [18, 31].

67 The precise contribution of TRPV4 to thermosensing and thermoregulation *in vivo* remain  
68 unclear. No changes in escape latency from heat stimuli were observed in the hotplate  
69 challenge [35, 36]. However, post subcutaneous injection of capsaicin or carrageenan,  
70 TRPV4<sup>-/-</sup> mice showed longer escape latencies from the hot surface compared to wild-type  
71 [36]. In another study, it was shown that TRPV4 is required for normal thermal  
72 responsiveness *in vivo*; on a thermal gradient, TRPV4<sup>-/-</sup> mice selected warmer floor  
73 temperatures. In addition, TRPV4<sup>-/-</sup> mice also exhibited prolonged withdrawal latencies  
74 during acute tail heating [37].

75 In terms of pharmacological manipulations, activation of TRPV4 with topological RN1747  
76 decreased core temperature of *rattus norvegicus* and increased tail vasodilatation [38]. The  
77 effects of a TRPV4 inhibitor (HC067047), in the same study were mixed with increases of  
78 core body temperature with ambients of 26 and 30<sup>°</sup>C, but not 22 and 32<sup>°</sup>C.

79 In this study we had aimed to investigate whether the small molecule TRPV4 inhibitor,  
80 GSK2193874, would decrease tail vasodilation response to elevated ambient temperatures.  
81 As a surrogate for tail vasodilation we used tail blood flow measured by volume  
82 plethysmography [39]. We also investigated frequency domain heart rate variability (HRV).  
83 HRV is a sensitive tool that assesses the time difference between consecutive heart beats to  
84 evaluate autonomic nervous system modulation [40, 41]. Accumulating data suggests that  
85 ultra-short-range HRV can be successfully derived from as low as 30s of human ECG [42, 43]  
86 and pulse rate variability (estimation of variation in heart rate from *photoplethysmography*)  
87 has recently been successfully measured from the rat tail [44]. Potentially, measurement of  
88 HRV from tail-cuffs would be a useful 3Rs advancement, since surgery is not required.  
89 Therefore, we sought to, for the first time, (a) establish, empirically, the length of heart rate  
90 (HR) record necessary for HRV in mice and (b) perform HRV from mouse tail volume  
91 plethysmography using the CODA apparatus. HRV reflects homeostasis in thermoregulation  
92 and blood pressure control and has been shown to be modulated by thermal stimuli in  
93 humans [45].

94 Surprisingly, we found the TRPV4 inhibitor increased tail blood flow when measured above  
95 mouse thermoneutrality, and we saw temperature dependent changes in ultra-short-range

96 HRV raising the possibility that TRPV4 ion channels expressed outside of the vasculature, for  
97 example in the central nervous system, may also be involved with rodent thermoregulation.  
98

99 **Methods**

100 *Animals*

101 Fourteen female adult CD1-mice (Charles River, UK) were used. All experimental procedures  
102 were ethically approved by the University's Animal Welfare Committee and performed  
103 under a UK Home Office Scientific Procedures licence (70/8746).

104 *Volume pressure plethysmography (VPR) recording*

105 We used the CODA tail volume plethysmography (VPR) system (Kent Scientific, Torrington,  
106 CT, USA) on control CD1-mice and mice that had received the selective TRPV4 antagonist  
107 GSK2193874. Full details of warming methodology and VPR methods are included in the  
108 supplementary materials. Note, all temperatures reported are ambient temperatures read  
109 from the thermocouple.

110 *Statistical Analyses*

111 Blood pressure (MAP), heart rate (HR) and blood flow statistical comparisons were made  
112 with the nlme package in R, which incorporates a repeated measures design. For HRV  
113 statistical comparisons, we used MANOVA in Minitab (PA, USA).  $p \leq 0.05$  was taken as  
114 significant.

115 *Drugs*

116 Midazolam was supplied by our animal service unit, but GSK2193874 (300  $\mu\text{g}/\text{kg}$ , *i.p.*) and  
117 DMSO were obtained from Sigma-Aldrich. GSK2193874 was dissolved in DMSO at 20 mg/ml  
118 stock then diluted 1:100 before *i.p.* injection (0.2 mg/ml), following [23, 34]. "Control"  
119 includes 1% DMSO and volume of injection was dependent upon animal weight.

120

## 121 Results

122 We measured MAP, HR and blood flow (Flow) in 14 animals with and without GSK2193874  
123 over the ambient temperature range of 31°C to 36°C. These are plotted in two-factor  
124 (treatment, temperature) format and analysed with a repeated-measures, mixed effects  
125 design. There was a statistically significant effect of temperature on all parameters  
126 measured, MAP (**Figure 1A**: Temperature  $F=5.34$ ,  $p\leq 0.05$ ; Drug  $F=0.38$   $p>0.05$ , Drug x  
127 Temperature  $F=0.17$ ,  $p>0.05$ ), HR (**Figure 1B**: Temperature  $F=7.37$ ,  $p\leq 0.05$ ; drug  $F=0.68$   
128  $p>0.05$ , Drug x Temperature  $F=0.23$ ,  $p>0.05$ ) and tail blood flow (**Figure 1C**: Temperature  
129  $F=13.21$ ,  $p\leq 0.005$ ; drug  $F=5.57$ ,  $p\leq 0.05$ , Drug x Temperature  $F=14.00$ ,  $p\leq 0.0005$ ). In the  
130 cases of HR and MAP there was no significant effect of treatment with the TRPV4 antagonist  
131 (GSK2193874). However, with tail blood flow there was both a significant increase with  
132 GSK2193874 treatment and a very highly significant interaction between temperature and  
133 GSK2193874 treatment.

134 Since we were able to derive beat-by-beat heart rate records for several seconds (for  
135 example Supplementary Figure 1), we investigated whether HRV could be captured over  
136 such short periods. To test whether this was feasible, we simulated mouse heart rate  
137 interval records of decreasing length using a modified version of McSharry *et al.*, 2003 [46]  
138 and then measured HRV spectral powers by the Lomb-Scargle method [47, 48] over 3000  
139 simulations. **Figure 2A** shows that just a few seconds of ECG are sufficient to obtain a  
140 picture of the heart rate variability in a mouse, in so far as, increasing the simulation  
141 duration beyond this does not greatly affect the HRV spectra. We therefore measured HRV  
142 power in the 0.1 to 1.9Hz bands in our samples of control and GSK2193874 records (**Figure**  
143 **2B, C**) and compared these statistically with a MANOVA model, over a range of  
144 temperatures. There was no over-all statistical difference with temperature, however there  
145 was a statistically different set of spectra between control and GSK2193874 treated spectra.  
146 Furthermore, with univariate analyses, there was a significant difference between  
147 treatment and control at each individual frequency except the 0.5Hz banding.

148

149 **Discussion**

150 In this work we investigate the role of TRPV4 in rat tail blood flow with a systemic inhibitor  
151 of TRPV4, GSK2193874. Surprisingly, we find that tail blood flow is increased by  
152 GSK2193874. Inspection of Figure 1C., suggests that there is little effect of temperature, in  
153 control conditions, above ( $\geq$ ) 32°C, however the largest numerical increase in flow occurred  
154 above 35°C ambient. Possibly suggesting that this quite high ambient temperature was  
155 necessary to see the changes in TRPV4 activity. There was a detectable effect also on HRV,  
156 but no significant change in blood pressure or HR themselves.

157 *Blood flow, HR and MAP effects*

158 GSK2193874 is a small lipid soluble inhibitor of TRPV4 [19] that crosses the blood-brain  
159 barrier well (brain:plasma ratio = 0.6, personal communication with Dr David Behm of GSK)  
160 and so there are several locations at which TRPV4 could potentially influence the control of  
161 blood flow in response to elevated temperatures. A non-exhaustive list of possible sites of  
162 action could include the vasculature or cardiovascular control neurones.

163 TRPV4 is expressed in both vascular smooth muscle and the endothelial cell lining [49].  
164 Activation of these channels leads to clear vasodilatation. Whilst the mechanism of this  
165 vasodilatation is complex, involving both endothelial and smooth muscle cells, potential  
166 release of EDRF/EDHF and, ultimately, small local increases of  $\text{Ca}^{2+}$  activate potassium  
167 channels which hyperpolarize the muscle cells and allow relaxation/vasodilatation [31-33]. A  
168 TRPV4 inhibitor would therefore be expected to cause vasodilation (or have no effect if  
169 there was no constitutive TRPV4 activity) and so it seems unlikely the increase in tail blood  
170 flow we report in this study results from direct action on the vasculature. Furthermore, if  
171 the effect of GSK2193874 were primarily on blood vessels to cause dilation, we would have  
172 expected to see an over-all drop in MAP, and possibly then a reflex increase in HR since the  
173 baroreceptor loop features in established mechanisms of cardiovascular control as well as,  
174 specifically, thermoregulation [50, 51]. We saw no change in blood pressure or heart rate,  
175 although multivariate analysis detected a small change in short-range HRV analysis. The  
176 potential for us to have missed such a baroreceptor mediated effect due Type II errors is  
177 discussed in the *limitations* section below.

178 A second location of TRPV4 channels that may be of relevance is the central nervous  
179 system, for example the hypothalamus [52]. It is known that other transient receptor



180 potential channels influence the cardiovascular system via changes in sympathetic activity  
181 [53, 54]. Our own work shows that TRPV4 channels are located on pre-autonomic neurones  
182 of the hypothalamic paraventricular nucleus (PVN) and can influence cardiovascular control  
183 in response to osmotic challenge [55, 56] and this effect was abolished with a TRPV4  
184 inhibitor [55]. At the neuronal level, we have shown that the action current frequency of  
185 parvocellular PVN neurones is dramatically reduced when TRPV4 channels are inhibited  
186 [56]. To date, there have been no studies that have explored thermoregulatory roles for  
187 TRPV4 in central cardiovascular control neurones.

188

### 189 *HRV effects*

190 HRV analysis is an increasingly common method for cardiovascular assessment. In humans,  
191 for example, decreased HRV (i.e., a very steady pulse) is an independent predictor of cardiac  
192 mortality [57]. In animals too it is proving increasingly useful in a range of contexts  
193 including phenotyping transgenic animals [58], investigating cardiovascular effects of drugs  
194 [59] and predicting arrhythmias [60]. Whilst there are many papers analysing HRV in mice  
195 using radiotelemetry [61] we investigated here whether it was possible to do this with VPR. It  
196 has previously been shown that relatively long *photoplethysmography* recordings could be  
197 used for HRV, with high accuracy, but the present study is the first to systematically analyse  
198 how long a recording needs to be. The derivation of this short-range HRV from non-invasive  
199 apparatus may prove a useful advance in 3Rs. Since the average mouse heart rate is some 8  
200 times that of a human, an 8s segment would be equivalent to the standard 1 minute of  
201 recording necessary to detect higher frequency components of human ECG [41]. Here,  
202 simulation shows that periodograms from very short segments of ECG are similar to that of  
203 conventional 1-minute records (Figure 2A), and these data themselves and this approach  
204 may be of field interest. In terms of the response to temperature, we did not see an overall  
205 effect on HRV, probably because temperature typically effects the low frequency powers,  
206 beyond the scope of ultra-short-range recording [45], however, GSK2193874 did  
207 significantly alter overall frequency power.

208

### 209 *Limitations*

210 We measured only ambient temperature and not core temperature. We felt that the loss of  
211 this important information was necessary to avoid the disturbance of rectal thermocouple

212 of mice in the non-invasive recording equipment. Also, we used sedation that could  
213 influence the whole animal responses and only *female mice*, unlike many males only studies  
214 [23, 34]. Furthermore, to keep the study manageable, we opted for a one antagonist dose  
215 study rather than a full in vivo dose-response curve, which would have been useful. It is  
216 difficult to predict accurately the local concentration that an ion channel will “see” when a  
217 drug given systemically will reach, but if we assume that GSK2193874 has a typical volume  
218 of distribution of between 1 and 10L/kg, our 300µg/kg dose would translate to  
219 approximately 40 to 400nM, in the order of the maximal dose for GSK2193874 on TRPV4  
220 channels [23]. Although GSK2193874 is highly selective for TRPV4 compared to the other  
221 200+ proteins it has been assayed against [23], repeating our studies with TRPV4-/- lines  
222 [31] would be the only way to confirm with certainty that the true target was indeed TRPV4.  
223 We encountered technical challenges too, e.g., recording VPR data below 30°C (ambient)  
224 was unreliable, so we report a relatively limited temperature range rather than strictly hot  
225 vs cold. These limitations could be addressed by a telemetric study, but large motivation for  
226 our current approach was to utilise a non-invasive blood pressure design, for 3Rs ethical  
227 reasons. Furthermore, as in many physiological studies, statistical power was an issue. Our  
228 initial design (see supplementary information) included a power analysis for heart rate and  
229 blood pressure; which made a number of assumptions but passed 80% power with around 8  
230 or 9 animals. We then used 14, however, we were not able to get all conditions for all  
231 animals and so the final statistical power could be below 80%. We have hypothesised that  
232 an increase of blood flow, by TRPV4 antagonist in the absence of significant changes in  
233 MAP/HR would be compatible with a central mechanism of vasodilation. However, if we  
234 simply missed changes due to a type II error, the vasodilation could result from baroreflex-  
235 mediated mechanisms. This could be addressed by either increasing animal numbers or by  
236 repeating similar experiments with surgical or pharmacological block of the baroreceptor  
237 reflex [62].

238

239 In conclusion, this whole animal study shows that a TRPV4 antagonist has a significant effect  
240 on tail blood flow, in the context of thermoregulation, but its site of action, and the  
241 mechanism of such modulation remain to be determined. We also demonstrate non-  
242 invasive measurement of frequency domain HRV analysis from very short-range data that  
243 may prove useful in future 3Rs friendly research.

244

245 **Acknowledgements**

246 This project received funding from BBSRC: BB/T002115/1, BB/T002115/1

247 BB/S008136/1 AND BB/N003020/1 awarded to RBJ.

248

## 249   **References**

250

- 251   [1] Fuller, A., Moss, D.G., Skinner, J.D., Jessen, P.T., Mitchell, G. & Mitchell, D. 1999 Brain,  
252   abdominal and arterial blood temperatures of free-ranging eland in their natural habitat.  
253   *Pflügers Arch* **438**, 671-680. (doi:10.1007/s004249900105).
- 254   [2] Fuller, A., Carter, R.N. & Mitchell, D. 1998 Brain and abdominal temperatures at fatigue  
255   in rats exercising in the heat. *Journal of applied physiology (Bethesda, Md. : 1985)* **84**, 877-  
256   883. (doi:10.1152/jappl.1998.84.3.877).
- 257   [3] Walters, T.J., Ryan, K.L., Tate, L.M. & Mason, P.A. 2000 Exercise in the heat is limited by a  
258   critical internal temperature. *Journal of applied physiology (Bethesda, Md. : 1985)* **89**, 799-  
259   806. (doi:10.1152/jappl.2000.89.2.799).
- 260   [4] Tan, C.L. & Knight, Z.A. 2018 Regulation of Body Temperature by the Nervous System.  
261   *Neuron* **98**, 31-48. (doi:10.1016/j.neuron.2018.02.022).
- 262   [5] Hemingway, A. & Price, W.M. 1968 The autonomic nervous system and regulation of  
263   body temperature. *Anesthesiology* **29**, 693-701. (doi:10.1097/00000542-196807000-00012).
- 264   [6] Liedtke, W.B. 2017 Deconstructing mammalian thermoregulation. *Proc Natl Acad Sci U S*  
265   *A* **114**, 1765-1767. (doi:10.1073/pnas.1620579114).
- 266   [7] Hammel, H.T. 1968 Regulation of internal body temperature. *Annu Rev Physiol* **30**, 641-  
267   710. (doi:10.1146/annurev.ph.30.030168.003233).
- 268   [8] Liu, J.-S., Wang, D.-H. & Sun, R.-Y. 2004 Metabolism and thermoregulation in three  
269   species of rodent from Northeastern China. *Journal of Thermal Biology* **29**, 177-183.  
270   (doi:<https://doi.org/10.1016/j.jtherbio.2004.02.003>).
- 271   [9] Phillips, P.K. & Heath, J.E. 1992 Heat exchange by the pinna of the african elephant  
272   (*Loxodonta africana*). *Comparative Biochemistry and Physiology Part A: Physiology* **101**, 693-  
273   699. (doi:[https://doi.org/10.1016/0300-9629\(92\)90345-Q](https://doi.org/10.1016/0300-9629(92)90345-Q)).
- 274   [10] Conley, K.E. & Porter, W.P. 1985 Heat loss regulation: role of appendages and torso in  
275   the deer mouse and the white rabbit. *Journal of comparative physiology. B, Biochemical,*  
276   *systemic, and environmental physiology* **155**, 423-431. (doi:10.1007/bf00684671).
- 277   [11] Porter, W.R. & Witmer, L.M. 2020 Vascular Patterns in the Heads of Dinosaurs:  
278   Evidence for Blood Vessels, Sites of Thermal Exchange, and Their Role in Physiological  
279   Thermoregulatory Strategies. *Anatomical record (Hoboken, N.J. : 2007)* **303**, 1075-1103.  
280   (doi:10.1002/ar.24234).
- 281   [12] Khamas, W.A., Smodlaka, H., Leach-Robinson, J. & Palmer, L. 2012 Skin histology and its  
282   role in heat dissipation in three pinniped species. *Acta Veterinaria Scandinavica* **54**, 46.  
283   (doi:10.1186/1751-0147-54-46).
- 284   [13] Hankenson, F.C., Marx, J.O., Gordon, C.J. & David, J.M. 2018 Effects of Rodent  
285   Thermoregulation on Animal Models in the Research Environment. *Comp Med* **68**, 425-438.  
286   (doi:10.30802/AALAS-CM-18-000049).
- 287   [14] Johansen, K. 1962 Heat exchange through the muskrat tail. Evidence for vasodilator  
288   nerves to the skin. *Acta physiologica Scandinavica* **55**, 160-169. (doi:10.1111/j.1748-  
289   1716.1962.tb02428.x).
- 290   [15] Gordon, C.J. 2017 The mouse thermoregulatory system: Its impact on translating  
291   biomedical data to humans. *Physiol Behav* **179**, 55-66. (doi:10.1016/j.physbeh.2017.05.026).
- 292   [16] Grant, R.T. 1963 Vasodilation and body warming in the rat. *J Physiol* **167**, 311-317.  
293   (doi:10.1113/jphysiol.1963.sp007151).

- 294 [17] Young, A.A. & Dawson, N.J. 1982 Evidence for on-off control of heat dissipation from  
295 the tail of the rat. *Can J Physiol Pharmacol* **60**, 392-398. (doi:10.1139/y82-057).
- 296 [18] Sand, C.A., Starr, A., Nandji, M. & Grant, A.D. 2015 Blockade or deletion of transient  
297 receptor potential vanilloid 4 (TRPV4) is not protective in a murine model of sepsis.  
298 *F1000Res* **4**, 93. (doi:10.12688/f1000research.6298.1).
- 299 [19] Cheung, M., Bao, W., Behm, D.J., Brooks, C.A., Bury, M.J., Dowdell, S.E., Eidam, H.S.,  
300 Fox, R.M., Goodman, K.B., Holt, D.A., et al. 2017 Discovery of GSK2193874: An Orally Active,  
301 Potent, and Selective Blocker of Transient Receptor Potential Vanilloid 4. *ACS Med Chem*  
302 *Lett* **8**, 549-554. (doi:10.1021/acsmchemlett.7b00094).
- 303 [20] Shannon, A.H., Elder, C.T., Lu, G., Su, G., Mast, A., Salmon, M.D., Montgomery, W.G.,  
304 Spinosa, M.D., Upchurch, G.R., Jr. & Sharma, A.K. 2020 Pharmacologic inhibition of transient  
305 receptor channel vanilloid 4 attenuates abdominal aortic aneurysm formation. *FASEB J.*  
306 (doi:10.1096/fj.202000251R).
- 307 [21] Thorneloe, K.S., Cheung, M., Holt, D.A. & Willette, R.N. 2017 PROPERTIES OF THE TRPV4  
308 AGONIST GSK1016790A AND the TRPV4 ANTAGONIST GSK2193874. *Physiol Rev* **97**, 1231-  
309 1232. (doi:10.1152/physrev.00019.2017).
- 310 [22] Zhu, Y.H. & Pei, Z.M. 2018 GSK2193874 treatment at heatstroke onset reduced cell  
311 apoptosis in heatstroke mice. *Cell Mol Biol (Noisy-le-grand)* **64**, 36-42.
- 312 [23] Thorneloe, K.S., Cheung, M., Bao, W., Alsaïd, H., Lenhard, S., Jian, M.Y., Costell, M.,  
313 Maniscalco-Hauk, K., Krawiec, J.A., Olzinski, A., et al. 2012 An orally active TRPV4 channel  
314 blocker prevents and resolves pulmonary edema induced by heart failure. *Sci Transl Med* **4**,  
315 159ra148. (doi:10.1126/scitranslmed.3004276).
- 316 [24] Li, M., Fang, X.Z., Zheng, Y.F., Xie, Y.B., Ma, X.D., Liu, X.T., Xia, Y. & Shao, D.H. 2019  
317 Transient receptor potential vanilloid 4 is a critical mediator in LPS mediated inflammation  
318 by mediating calcineurin/NFATc3 signaling. *Biochem Biophys Res Commun* **513**, 1005-1012.  
319 (doi:10.1016/j.bbrc.2019.04.020).
- 320 [25] Dias, F.C., Alves, V.S., Matias, D.O., Figueiredo, C.P., Miranda, A.L.P., Passos, G.F. &  
321 Costa, R. 2019 The selective TRPV4 channel antagonist HC-067047 attenuates mechanical  
322 allodynia in diabetic mice. *Eur J Pharmacol* **856**, 172408.  
323 (doi:10.1016/j.ejphar.2019.172408).
- 324 [26] Voets, T., Prenen, J., Vriens, J., Watanabe, H., Janssens, A., Wissenbach, U., Bodding,  
325 M., Droogmans, G. & Nilius, B. 2002 Molecular determinants of permeation through the  
326 cation channel TRPV4. *Journal of Biological Chemistry* **277**, 33704-33710.  
327 (doi:10.1074/jbc.M204828200  
328 M204828200 [pii]).
- 329 [27] Watanabe, H., Davis, J.B., Smart, D., Jerman, J.C., Smith, G.D., Hayes, P., Vriens, J.,  
330 Cairns, W., Wissenbach, U., Prenen, J., et al. 2002 Activation of TRPV4 channels (hVRL-  
331 2/mTRP12) by phorbol derivatives. *Journal of Biological Chemistry* **277**, 13569-13577.  
332 (doi:10.1074/jbc.M200062200).
- 333 [28] Chung, M.K., Lee, H. & Caterina, M.J. 2003 Warm temperatures activate TRPV4 in  
334 mouse 308 keratinocytes. *J Biol Chem* **278**, 32037-32046. (doi:10.1074/jbc.M303251200).
- 335 [29] Watanabe, H., Vriens, J., Suh, S.H., Benham, C.D., Droogmans, G. & Nilius, B. 2002 Heat-  
336 evoked activation of TRPV4 channels in a HEK293 cell expression system and in native  
337 mouse aorta endothelial cells. *The Journal of biological chemistry* **277**, 47044-47051.  
338 (doi:10.1074/jbc.M208277200).
- 339 [30] Shibasaki, K., Suzuki, M., Mizuno, A. & Tominaga, M. 2007 Effects of Body Temperature  
340 on Neural Activity in the Hippocampus: Regulation of Resting Membrane Potentials by

- 341 Transient Receptor Potential Vanilloid 4. *The Journal of Neuroscience* **27**, 1566-1575.  
342 (doi:10.1523/jneurosci.4284-06.2007).
- 343 [31] Earley, S., Pauyo, T., Drapp, R., Tavares, M.J., Liedtke, W. & Brayden, J.E. 2009 TRPV4-  
344 dependent dilation of peripheral resistance arteries influences arterial pressure. *Am J*  
345 *Physiol Heart Circ Physiol* **297**, H1096-1102. (doi:10.1152/ajpheart.00241.2009).
- 346 [32] Campbell, W.B. & Fleming, I. 2010 Epoxyeicosatrienoic acids and endothelium-  
347 dependent responses. *Pflugers Arch* **459**, 881-895. (doi:10.1007/s00424-010-0804-6).
- 348 [33] Filosa, J.A., Yao, X. & Rath, G. 2013 TRPV4 and the regulation of vascular tone. *J*  
349 *Cardiovasc Pharmacol* **61**, 113-119. (doi:10.1097/FJC.0b013e318279ba42).
- 350 [34] Pankey, E.A., Zsombok, A., Lasker, G.F. & Kadowitz, P.J. 2014 Analysis of responses to  
351 the TRPV4 agonist GSK1016790A in the pulmonary vascular bed of the intact-chest rat. *Am J*  
352 *Physiol Heart Circ Physiol* **306**, H33-H40. (doi:10.1152/ajpheart.00303.2013).
- 353 [35] Suzuki, M., Mizuno, A., Kodaira, K. & Imai, M. 2003 Impaired pressure sensation in mice  
354 lacking TRPV4. *J Biol Chem* **278**, 22664-22668. (doi:10.1074/jbc.M302561200).
- 355 [36] Todaka, H., Taniguchi, J., Satoh, J., Mizuno, A. & Suzuki, M. 2004 Warm temperature-  
356 sensitive transient receptor potential vanilloid 4 (TRPV4) plays an essential role in thermal  
357 hyperalgesia. *J Biol Chem* **279**, 35133-35138. (doi:10.1074/jbc.M406260200).
- 358 [37] Lee, H., Iida, T., Mizuno, A., Suzuki, M. & Caterina, M.J. 2005 Altered thermal selection  
359 behavior in mice lacking transient receptor potential vanilloid 4. *J Neurosci* **25**, 1304-1310.  
360 (doi:10.1523/JNEUROSCI.4745.04.2005).
- 361 [38] Vizin, R.C., Scarpellini Cda, S., Ishikawa, D.T., Correa, G.M., de Souza, C.O., Gargaglioni,  
362 L.H., Carrettiero, D.C., Bicego, K.C. & Almeida, M.C. 2015 TRPV4 activates autonomic and  
363 behavioural warmth-defence responses in Wistar rats. *Acta Physiol (Oxf)* **214**, 275-289.  
364 (doi:10.1111/apha.12477).
- 365 [39] Feng, M., Whitesall, S., Zhang, Y., Beibel, M., D'Alecy, L. & DiPetrillo, K. 2008 Validation  
366 of volume-pressure recording tail-cuff blood pressure measurements. *Am J Hypertens* **21**,  
367 1288-1291. (doi:10.1038/ajh.2008.301).
- 368 [40] Barbieri, R., Matten, E.C., Alabi, A.A. & Brown, E.N. 2005 A point-process model of  
369 human heartbeat intervals: new definitions of heart rate and heart rate variability. *Am J*  
370 *Physiol Heart Circ Physiol* **288**, H424-435. (doi:10.1152/ajpheart.00482.2003).
- 371 [41] Malik, M. 1996 Heart rate variability: standards of measurement, physiological  
372 interpretation and clinical use. Task Force of the European Society of Cardiology and the  
373 North American Society of Pacing and Electrophysiology. *Circulation* **93**, 1043-1065.
- 374 [42] Kim, J.W., Seok, H.S. & Shin, H. 2021 Is Ultra-Short-Term Heart Rate Variability Valid in  
375 Non-static Conditions? *Frontiers in Physiology* **12**. (doi:10.3389/fphys.2021.596060).
- 376 [43] Hamilton, R.M., McKechnie, P.S. & Macfarlane, P.W. 2004 Can cardiac vagal tone be  
377 estimated from the 10-second ECG? *Int J Cardiol* **95**, 109-115.  
378 (doi:10.1016/j.ijcard.2003.07.005).
- 379 [44] Tochinnai, R., Sekizawa, S.-i., Kobayashi, H. & Kuwahara, M. 2021 Autonomic nervous  
380 activity in rats can be evaluated by blood photoplethysmography-derived pulse rate  
381 variability analysis. *Translational and Regulatory Sciences* **3**, 17-21. (doi:10.33611/trs.2021-  
382 001).
- 383 [45] Fleisher, L.A., Frank, S.M., Sessler, D.I., Cheng, C., Matsukawa, T. & Vannier, C.A. 1996  
384 Thermoregulation and heart rate variability. *Clin Sci (Lond)* **90**, 97-103.  
385 (doi:10.1042/cs0900097).

- 386 [46] McSharry, P.E., Clifford, G.D., Tarassenko, L. & Smith, L.A. 2003 A dynamical model for  
387 generating synthetic electrocardiogram signals. *IEEE Transactions on Biomedical Engineering*  
388 **50**, 289-294. (doi:10.1109/tbme.2003.808805).
- 389 [47] Lomb, N.R. 1976 Least-Squares Frequency Analysis Of Unequally Spaced Data.  
390 *Astrophysics and Space Science* **39**, 447--446.
- 391 [48] Scargle, J.D. 1982 Studies in astronomical time series analysis. II. Statistical aspects of  
392 spectral analysis of unevenly spaced data. *Astrophys J* **263**, 835-853.
- 393 [49] White, J.P., Cibelli, M., Urban, L., Nilius, B., McGeown, J.G. & Nagy, I. 2016 TRPV4:  
394 Molecular Conductor of a Diverse Orchestra. *Physiol Rev* **96**, 911-973.  
395 (doi:10.1152/physrev.00016.2015).
- 396 [50] Pires, W., Wanner, S.P., Lima, M.R., Oliveira, B.M., Guimarães, J.B., de Lima, D.C.,  
397 Haibara, A.S., Rodrigues, L.O., Coimbra, C.C. & Lima, N.R. 2010 Sinoaortic denervation  
398 prevents enhanced heat loss induced by central cholinergic stimulation during physical  
399 exercise. *Brain Res* **1366**, 120-128. (doi:10.1016/j.brainres.2010.09.110).
- 400 [51] Zhang, D., Ando, M., Yamasaki, F. & Sato, T. 2003 Carotid-sinus baroreflex modulation  
401 of core and skin temperatures in rats: an open-loop approach. *Jpn J Physiol* **53**, 461-466.  
402 (doi:10.2170/jjphysiol.53.461).
- 403 [52] Feetham, C.H., O'Brien, F. & Barrett-Jolley, R. 2018 Ion Channels in the Paraventricular  
404 Hypothalamic Nucleus (PVN); Emerging Diversity and Functional Roles. *Frontiers in*  
405 *physiology* **9**, 760. (doi:10.3389/fphys.2018.00760).
- 406 [53] Alawi, K.M., Aubdool, A.A., Liang, L., Wilde, E., Vepa, A., Psefteli, M.P., Brain, S.D. &  
407 Keeble, J.E. 2015 The sympathetic nervous system is controlled by transient receptor  
408 potential vanilloid 1 in the regulation of body temperature. *FASEB J* **29**, 4285-4298.  
409 (doi:10.1096/fj.15-272526).
- 410 [54] Aubdool, A.A., Graepel, R., Kodji, X., Alawi, K.M., Bodkin, J.V., Srivastava, S., Gentry, C.,  
411 Heads, R., Grant, A.D., Fernandes, E.S., et al. 2014 TRPA1 is essential for the vascular  
412 response to environmental cold exposure. *Nat Commun* **5**, 5732.  
413 (doi:10.1038/ncomms6732).
- 414 [55] Feetham, C.H., Nunn, N. & Barrett-Jolley, R. 2015 The depressor response to  
415 intracerebroventricular hypotonic saline is sensitive to TRPV4 antagonist RN1734. *Front*  
416 *Pharmacol* **6**, 83. (doi:10.3389/fphar.2015.00083).
- 417 [56] Feetham, C.H., Nunn, N., Lewis, R., Dart, C. & Barrett-Jolley, R. 2015 TRPV4 and KCa ion  
418 channels functionally couple as osmosensors in the paraventricular nucleus. *Br J Pharmacol*  
419 **172**, 1753-1768. (doi:10.1111/bph.13023).
- 420 [57] Thayer, J.F., Yamamoto, S.S. & Brosschot, J.F. 2010 The relationship of autonomic  
421 imbalance, heart rate variability and cardiovascular disease risk factors. *Int J Cardiol* **141**,  
422 122-131. (doi:10.1016/j.ijcard.2009.09.543).
- 423 [58] Gehrmann, J., Hammer, P.E., Maguire, C.T., Wakimoto, H., Triedman, J.K. & Berul, C.I.  
424 2000 Phenotypic screening for heart rate variability in the mouse. *Am J Physiol Heart Circ*  
425 *Physiol* **279**, H733-740. (doi:10.1152/ajpheart.2000.279.2.H733).
- 426 [59] Elghozi, J.L., Girard, A. & Laude, D. 2001 Effects of drugs on the autonomic control of  
427 short-term heart rate variability. *Auton Neurosci* **90**, 116-121. (doi:10.1016/S1566-  
428 0702(01)00276-4).
- 429 [60] Thomsen, M.B., Volders, P.G., Beekman, J.D., Matz, J. & Vos, M.A. 2006 Beat-to-Beat  
430 variability of repolarization determines proarrhythmic outcome in dogs susceptible to drug-  
431 induced torsades de pointes. *J Am Coll Cardiol* **48**, 1268-1276.  
432 (doi:10.1016/j.jacc.2006.05.048).

- 433 [61] Thireau, J., Zhang, B.L., Poisson, D. & Babuty, D. 2008 Heart rate variability in mice: a  
434 theoretical and practical guide. *Exp Physiol* **93**, 83-94. (doi:DOI  
435 10.1113/expphysiol.2007.040733).
- 436 [62] Shannon, J.R., Jordan, J., Black, B.K., Costa, F. & Robertson, D. 1998 Uncoupling of the  
437 baroreflex by N(N)-cholinergic blockade in dissecting the components of cardiovascular  
438 regulation. *Hypertension* **32**, 101-107. (doi:10.1161/01.hyp.32.1.101).
- 439
- 440



441 **Figures**

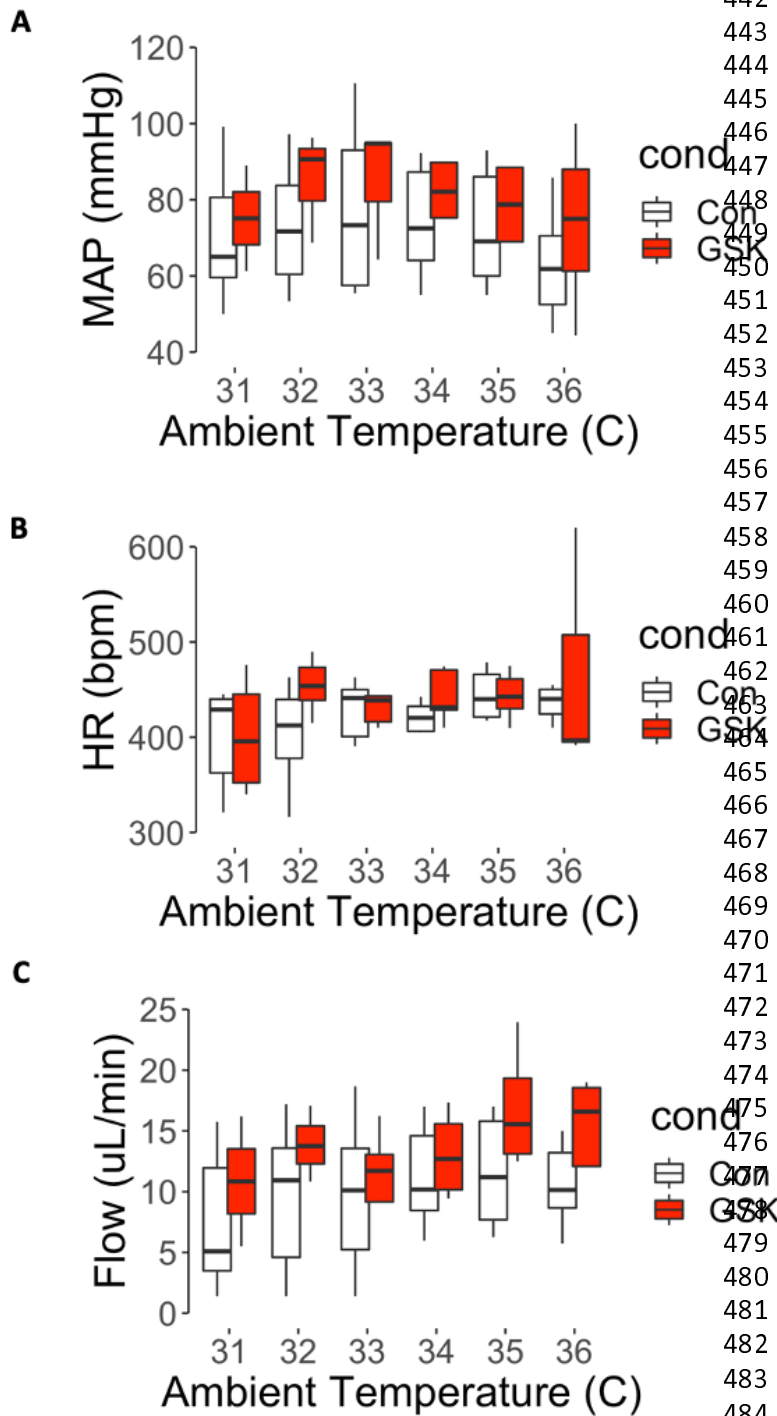

442 **Figure 1. Effects of**  
443 **Pharmacological inhibition**  
444 **of TRPV4 on blood**  
445 **pressure, heart rate and**  
446 **blood flow.**

447 (A) Mean arterial pressure  
448 at a range of ambient  
449 temperatures in control and  
450 GSK2193874, there was a  
451 significant association with  
452 temperature, but not drug.  
453 There was also no  
454 significant association  
455 between temperature and  
456 drug (Mixed effects model:  
457 See main text for details).

458 (B) Mean heart rate across  
459 a range of ambient  
460 temperature in control and  
461 GSK2193874, over-all there  
462 was a significant change of  
463 heart rate with  
464 temperature, but no  
465 significant difference with  
466 drug and no significant  
467 association between drug  
468 and temperature (Mixed  
469 effects model: See main  
470 text for details). (C) Tail

471 blood flow across a range of  
472 ambient temperature in  
473 control and GSK2193874.

474 Overall, there was a  
475 statistically significant  
476 increase of blood flow with  
477 temperature and with  
478 GSK2193874 and a  
479 significant interaction  
480 (Mixed effects model: See  
481 main text for details).

482 Overall,  $n = 14$  animals or  
483 for each temperature; 31°C  
484  $n = (9,4)$  32°C  $n = (10,4)$ ,

485 33°C  $n = (11,6)$ , 34°C  $n = (10,7)$ , 35°C  $n = (11,7)$  and 36°C  $n = (12,5)$ . To investigate specific  
486 temperature points that were different to the 31°C value, we treated temperature as a factor and  
487 ran the estimated-marginal means method with the R-package Emmeans. This consists of 66  
488 pairwise comparisons and we used Benjamini-Hochberg multiple comparison correction. In control,  
489 no individual flow is significantly greater than that at 31°C however, in GSK2193874, blood flow at  
490 both 35°C and 36°C was significantly greater than at 31°C ( $p < 0.05$ ).

491

492

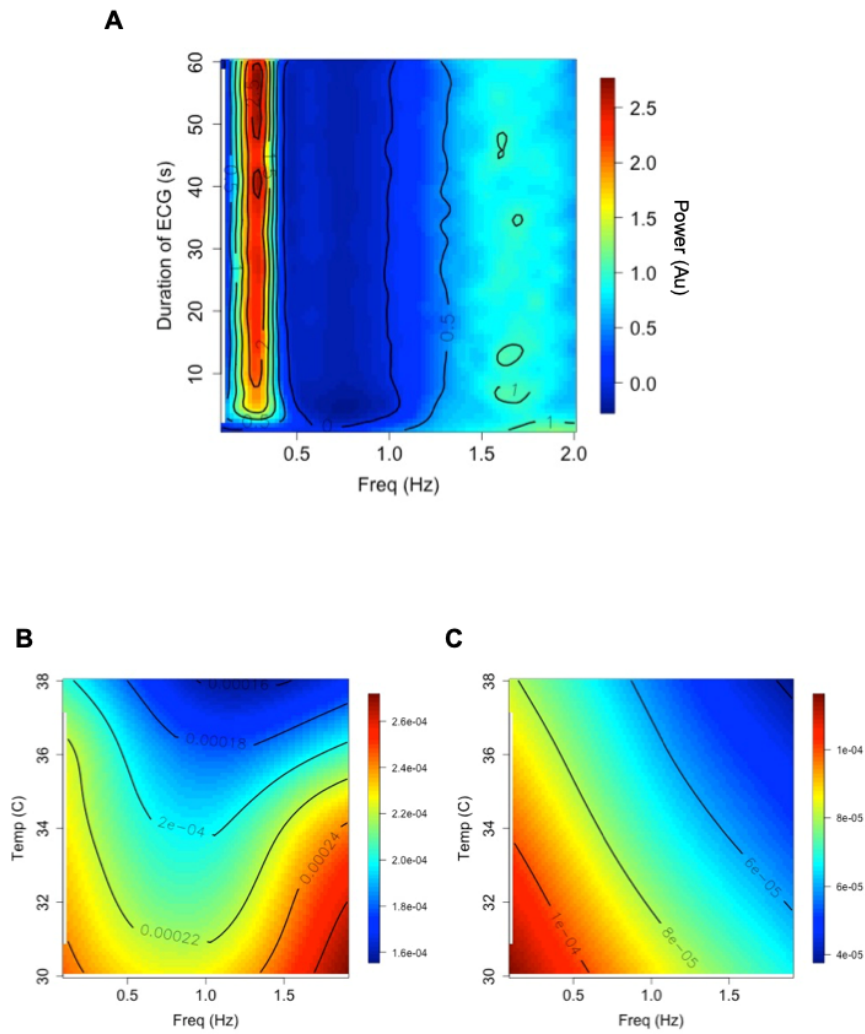

493

494 **Figure 2. Short range heart rate variability analysis. (A)** Stacked Lomb periodograms for  
495 3000 simulated ECG inter-beat interval datasets. Y-axis is the duration of the simulated ECG  
496 record, X-axis is the frequency component of each Lomb-Scargle. The periodograms have  
497 been normalized and scaled therefore the power (colour bar on the right) is in arbitrary  
498 units. Below are periodogram surfaces recorded at different temperatures under control  
499 **(B)**, or after injection GSK2193874 **(C)**. Power given in the scale-bars. MANOVA (Minitab)  
500 analyses show these two distributions are significantly different, Wilks lambda  $p < 0.05$ .  
501 Overall,  $n = 14$  animals.

**A**

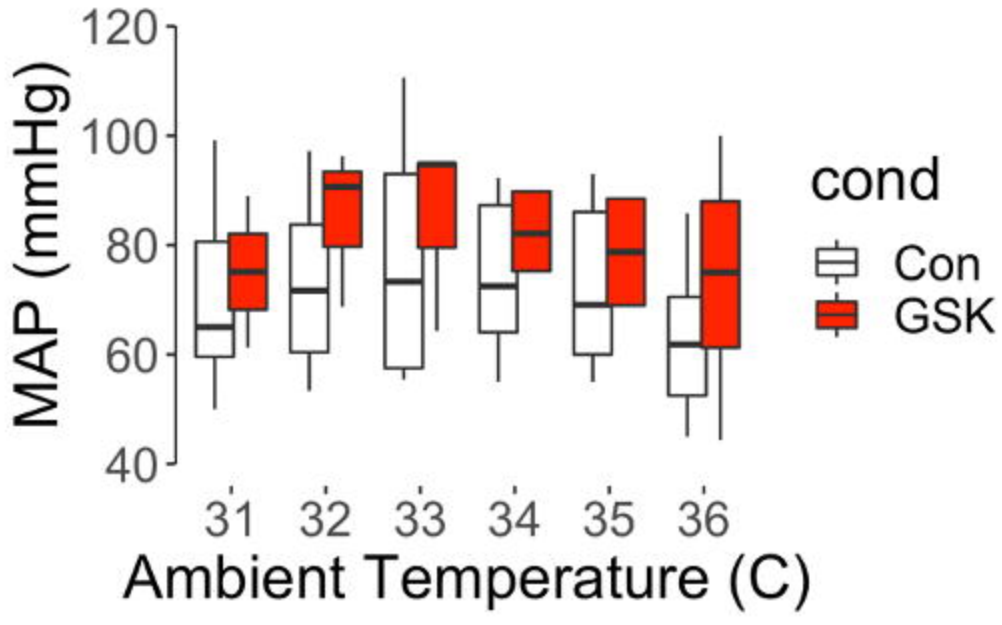

**B**

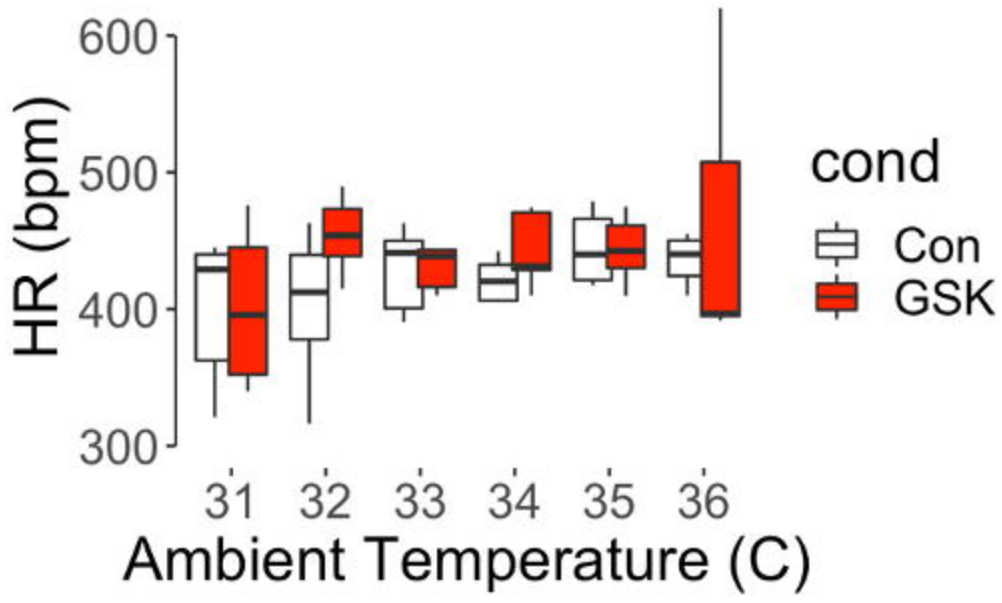

**C**

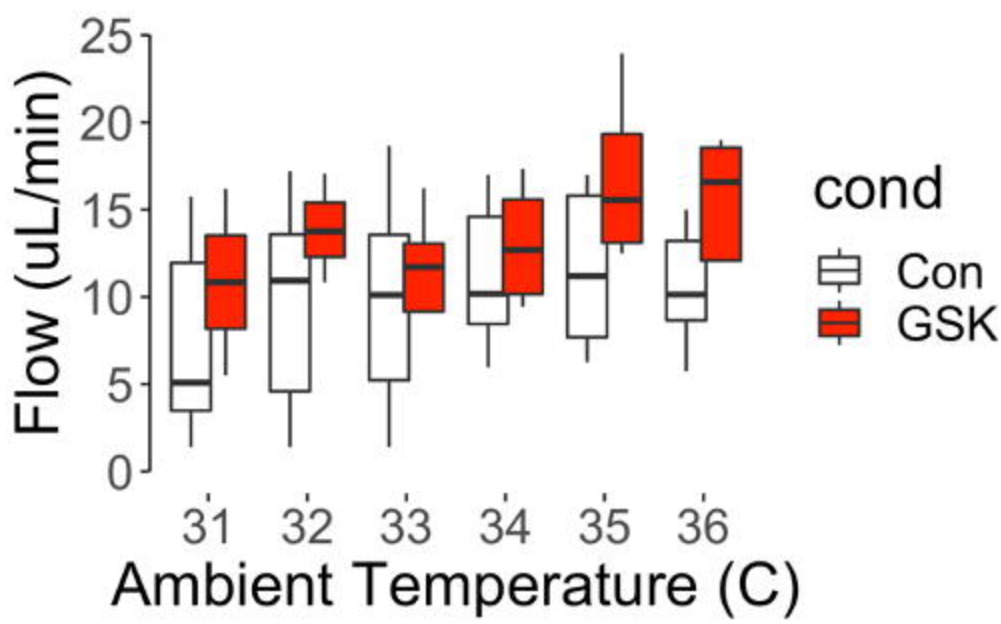

Figure 1

**A**

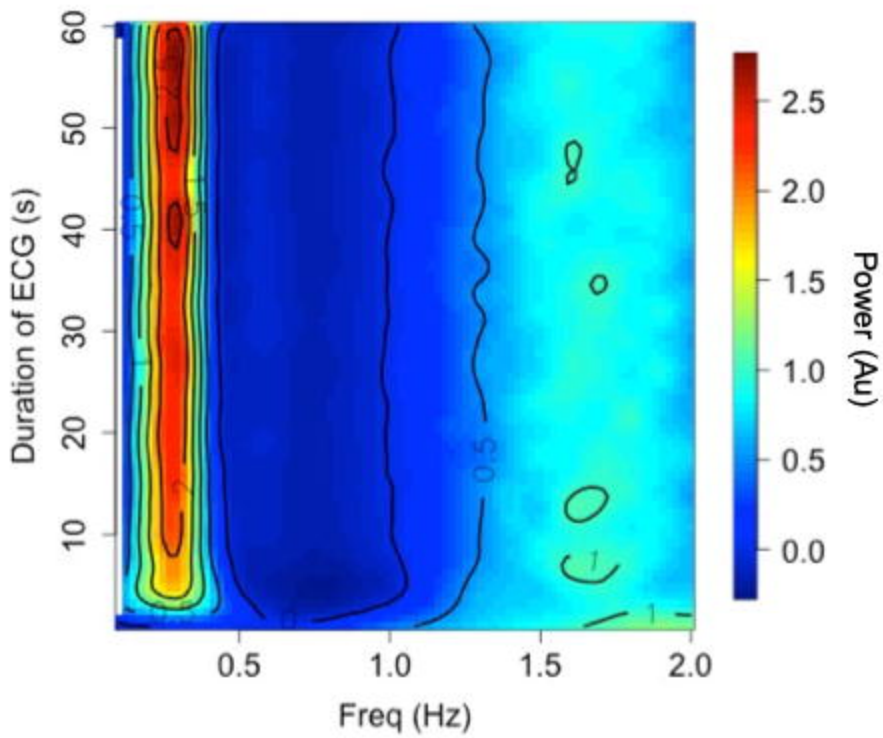

**B**

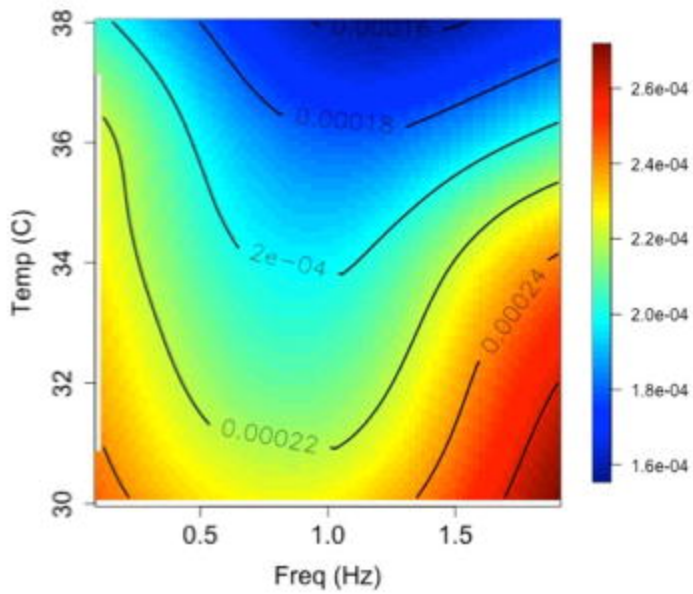

**C**

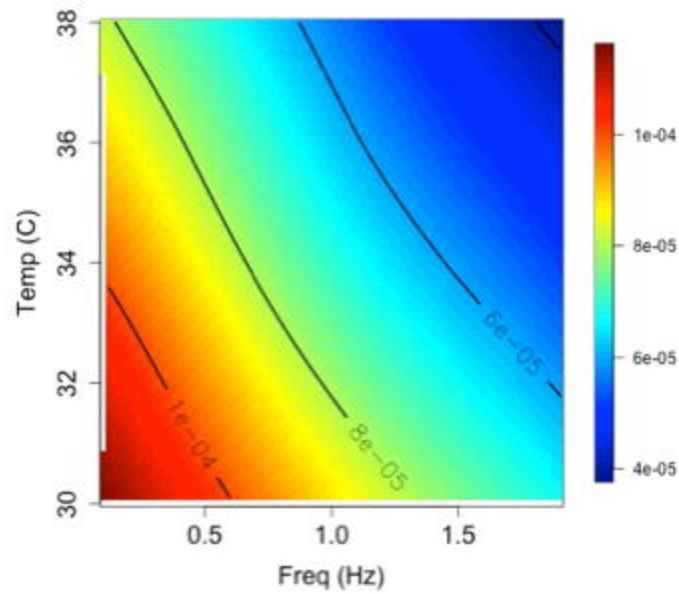

Figure 2
